# Supplementary material for: Effectiveness of Social Measures against COVID-19 Outbreaks in Selected Japanese Regions Analyzed by System Dynamic Modeling
Source: MDPI journal article supplement (doi:10.3390/ijerph17176238), 2020-08-27
Supplement: s1 [file s1]

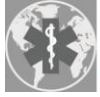

**Table S1.** Representative data of confirmed positives by polymerase chain reaction (PCR) virus testing on and after 11 March 2020.

| <b>Days after 11 March 2020</b> | <b>Tokyo</b> | <b>Osaka</b> | <b>Hokkaido</b> |
|---------------------------------|--------------|--------------|-----------------|
| 0                               | 6            | 7            | 7               |
| 5                               | 23           | 35           | 41              |
| 10                              | 69           | 52           | 48              |
| 15                              | 192          | 83           | 57              |
| 20                              | 454          | 171          | 66              |
| 25                              | 965          | 335          | 83              |
| 30                              | 1636         | 623          | 128             |
| 35                              | 2376         | 895          | 191             |
| 40                              | 3115         | 1223         | 340             |
| 45                              | 3768         | 1403         | 490             |
| 50                              | 4084         | 1553         | 656             |
| 55                              | 4643         | 1615         | 780             |
| 60                              | 4801         | 1666         | 843             |
| 65                              | 4893         | 1688         | 888             |
| 70                              | 4932         | 1697         | 908             |
| 75                              | -            | -            | 946             |
| 80                              | -            | -            | 973             |
| 85                              | -            | -            | 993             |
| 90                              | -            | -            | 1020            |

-: Data was not collected for analysis because disease spreading slowed down. The figures may differ from official announcement as official data can be corrected after verification.
